# Supplementary material for: Direct Observation of Defect Range and Evolution in Ion-Irradiated Single Crystalline Ni and Ni Binary Alloys
Source: PubMed Central journal article supplement (PMC4734288; doi:10.1038/srep19994), 2016-02-01
Supplement: srep19994-s1.pdf [file srep19994-s1.pdf]

# Direct Observation of Defect Range and Evolution in Ion-Irradiated Single Crystalline Ni and Ni Binary Alloys

Chenyang Lu<sup>1\*</sup>, Ke Jin<sup>2,3</sup>, Laurent K. Béland<sup>2</sup>, Feifei Zhang<sup>1</sup>, Taini Yang<sup>1</sup>, Liang Qiao<sup>4,5</sup>, Yanwen Zhang<sup>2</sup>, Hongbin Bei<sup>2</sup>, Hans M. Christen<sup>4</sup>, Roger E. Stoller<sup>2</sup>, Lumin Wang<sup>1\*</sup>

<sup>1</sup>Department of Nuclear Engineering and Radiological Science, University of Michigan, Ann Arbor, MI 48109-2104, USA

<sup>2</sup>Materials Science and Technology Division, Oak Ridge National Laboratory, Oak Ridge, TN 37831, USA

<sup>3</sup>Department of Materials Science & Engineering, University of Tennessee, Knoxville, TN 37996, USA

<sup>4</sup>Center for Nanophase Materials Sciences, Oak Ridge National Laboratory, Oak Ridge, TN 37831, USA

<sup>5</sup>School of Materials, The University of Manchester, Manchester M13 9PL, UK

\*Corresponding authors: chenylu@umich.edu; lmwang@umich.edu

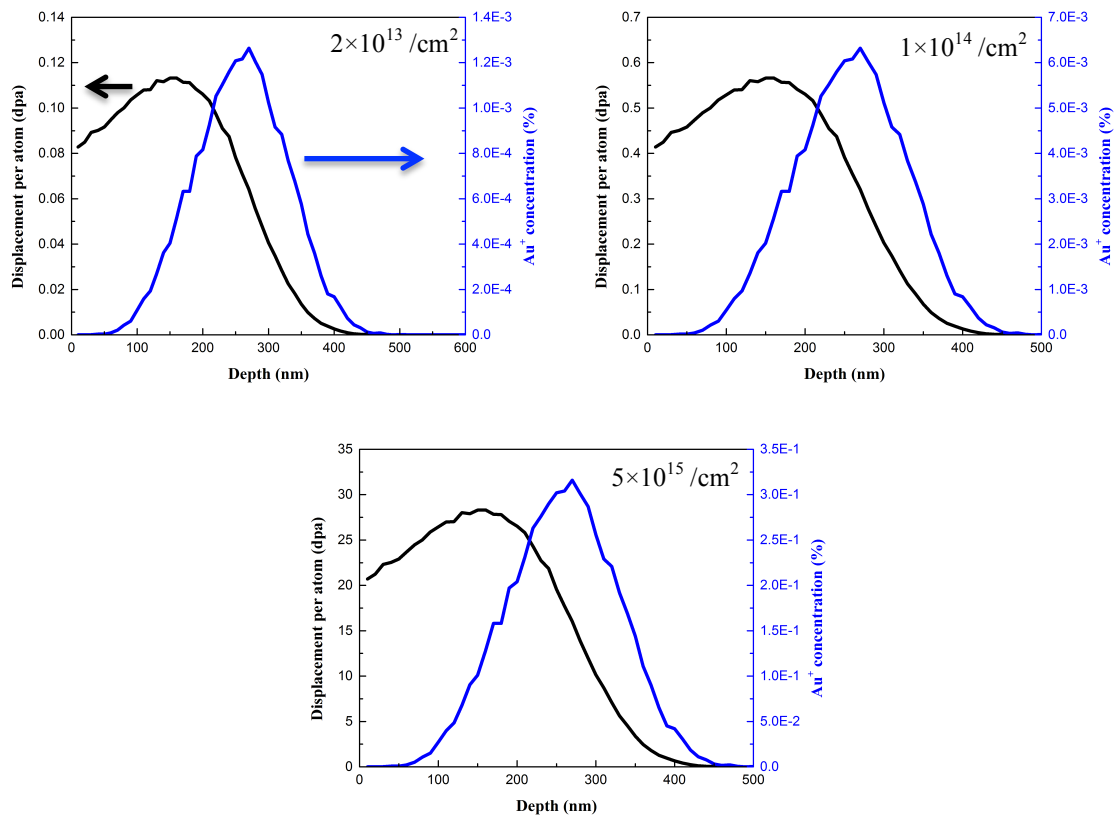

**Supplementary Figure S1. Predicted distributions of damage and Au concentration in pure Ni irradiated by 3 MeV Au ions to a fluence of (a)  $2 \times 10^{13} / \text{cm}^2$ ; (b)  $1 \times 10^{14} / \text{cm}^2$ ; (c)  $5 \times 10^{15} / \text{cm}^2$ .**

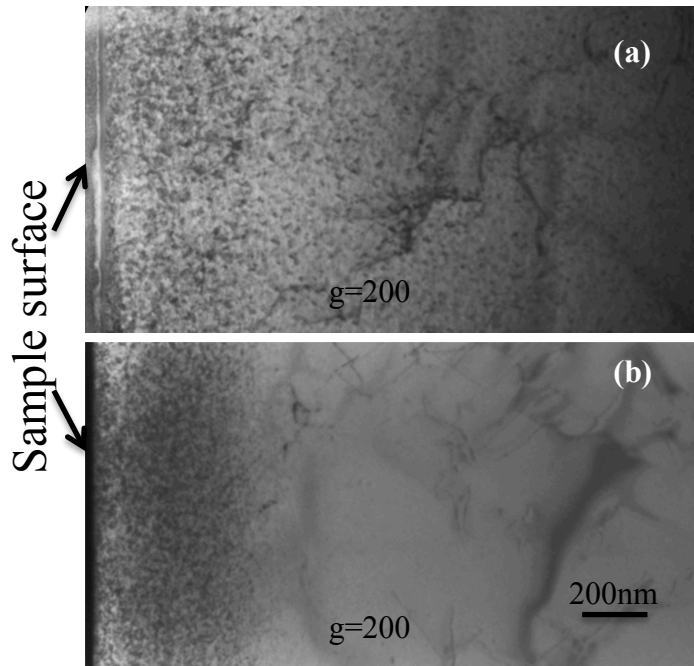

**Supplementary Figure S2. Bright-field TEM images of a NiCo sample before (a) and after (b) flash polishing following the lift-out procedure with a standard FIB technique,  $g=[200]$ .** The sample was initially irradiated by a 3 MeV Au ion beam to  $2 \times 10^{13} / \text{cm}^2$ . As demonstrated in (a), FIB polishing introduced a lot of “black dot damages” in the TEM specimen, most of which were removed by flash polishing as shown in (b).

**Supplementary Video S1. Two k-ART simulations were obtained by performing simulations of a 10 keV displacement cascade in Ni at 300 K (a) and 900 K (b).** Notably, small vacancy clusters (di-vacancies, tri-vacancies) were found to be much more mobile than single vacancies.

**Supplementary: Stress study.** We have performed 4-circle X-ray diffraction (XRD) measurements at symmetric and asymmetric diffraction peaks of (111), (002) and (113), respectively. An irradiation-induced peak broadening is observed. As compared to the full width at half maximum (FWHM) of the omega-scan through the 002 peak of  $\sim 0.1^\circ$  and  $0.05^\circ$  for the undamaged crystals, a peak width of  $\sim 0.3^\circ$  and  $0.4^\circ$  is identified in the irradiated NiCo and NiFe samples, respectively. The lattice in these irradiated regions, however, remains fcc phase aligned with the underlying undamaged crystal. Moreover, we observe a broadening in the 2-theta direction, which may correspond to existence of extended defects (interstitial loops) and the expected non-uniform distribution of the Au substitution at this high fluence ( $1.1 \times 10^{17} / \text{cm}^2$ ). Substitutional occupation of implanted Au ions is confirmed from ion channeling measurements on the same irradiated samples. We deduce from the XRD measurements an average lattice parameter expansion to 3.561 Å and 3.608 Å for NiCo and NiFe, as compared to the 3.533 Å and 3.589 Å for the corresponding undamaged crystals. The resulting range of 5% - 8% is in agreement with both the Au profile predicted from SRIM and measured from ion channeling technique.
